# Supplementary material for: Phase 1/2 study of uproleselan added to chemotherapy in patients with relapsed or refractory acute myeloid leukemia
Source: PubMed Central journal article supplement — Blood. 2021 Sep 22;139(8):1135–46. doi: 10.1182/blood.2021010721 (PMC11017789; doi:10.1182/blood.2021010721), 2021-09-22

## **Supplemental Material**

### **Phase 1/2 study of uproleselan added to chemotherapy in patients with relapsed or refractory acute myeloid leukemia**

Daniel J. DeAngelo,<sup>1</sup> Brian A. Jonas,<sup>2</sup> Jane L. Liesveld,<sup>3</sup> Dale L. Bixby,<sup>4</sup> Anjali S. Advani,<sup>5</sup> Paula Marlton,<sup>6</sup> John L. Magnani,<sup>7</sup> Helen M. Thackray,<sup>7</sup> Eric J. Feldman,<sup>7</sup> Michael E. O'Dwyer,<sup>8</sup> and Pamela S. Becker<sup>9</sup>

<sup>1</sup>Dana-Farber Cancer Institute, Boston, MA; <sup>2</sup>UC Davis Comprehensive Cancer Center, Sacramento, CA; <sup>3</sup>University of Rochester School of Medicine and Dentistry, Rochester, NY; <sup>4</sup>University of Michigan, Ann Arbor, MI; <sup>5</sup>Taussig Cancer Institute, Cleveland Clinic, Cleveland, OH; <sup>6</sup>Princess Alexandra Hospital, University of Queensland School of Medicine, Brisbane, Queensland, Australia; <sup>7</sup>GlycoMimetics, Rockville, MD; <sup>8</sup>National University of Ireland Galway, Galway, Ireland; <sup>9</sup>University of Washington/Fred Hutchinson Cancer Research Center, Seattle, WA\*

\*Currently affiliated with the School of Medicine, University of California Irvine, Irvine, CA

**Supplemental Figure 1. Patient disposition during phase 1 and phase 2.** ITT, intention to treat; MEC, combination regimen mitoxantrone, etoposide, cytarabine; 7+3, combination regimen cytarabine/idarubicin.

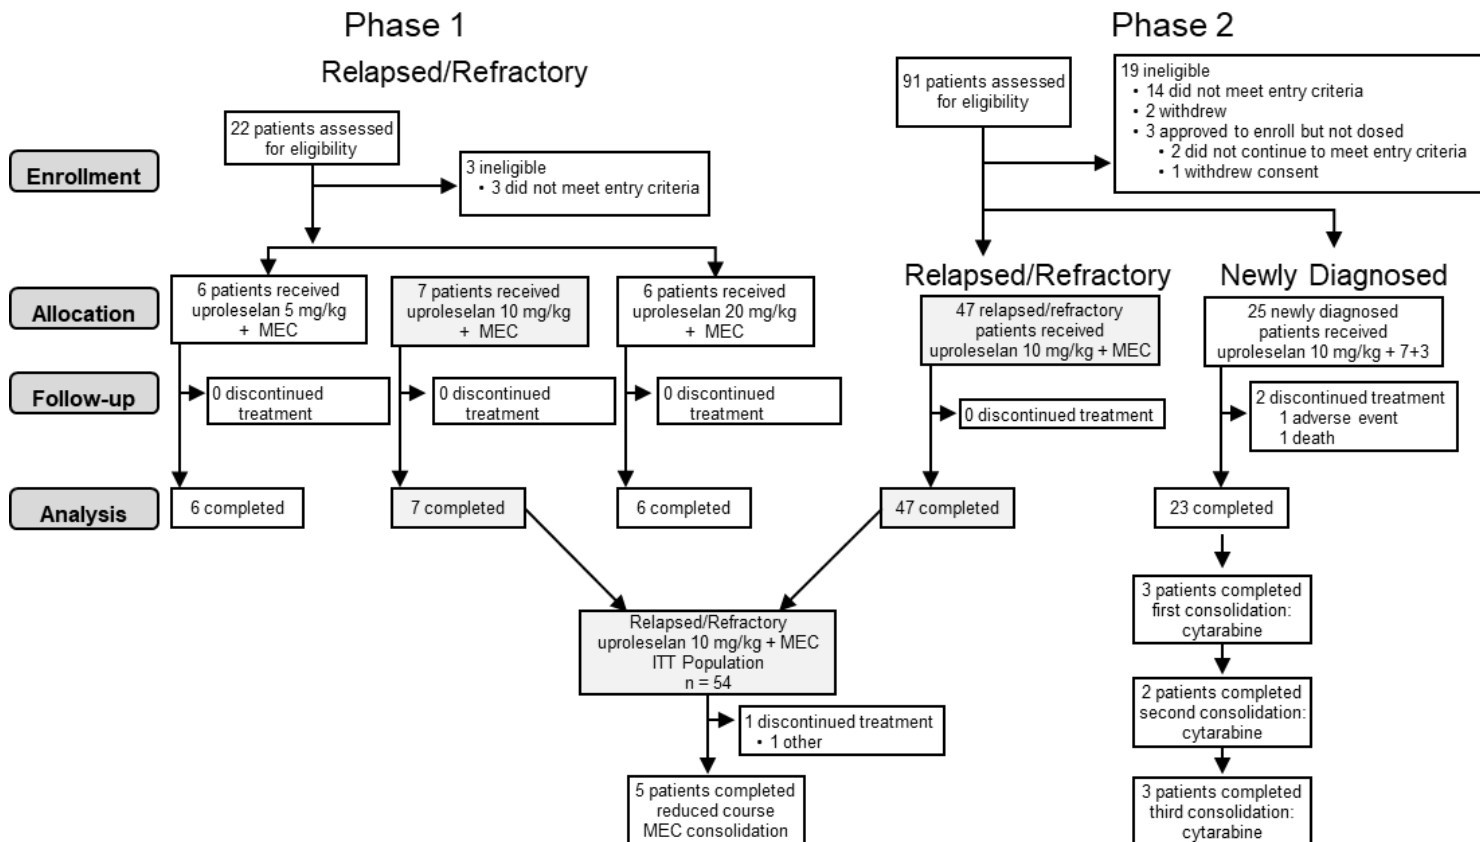

**Supplemental Table 1. Overview of treatment-emergent adverse events**

| Parameter                             | Patients, n (%)                |                              |                              |                                              |                                                        |
|---------------------------------------|--------------------------------|------------------------------|------------------------------|----------------------------------------------|--------------------------------------------------------|
|                                       | Uproleselan                    |                              |                              |                                              |                                                        |
|                                       | Phase 1<br>relapsed/refractory |                              |                              | RP2D<br>10 mg/kg                             | Newly<br>diagnosed<br>in patients<br>aged<br>≥60 years |
|                                       | 5 mg/kg<br>+ MEC<br>(n = 6)    | 10 mg/kg<br>+ MEC<br>(n = 7) | 20 mg/kg<br>+ MEC<br>(n = 6) | Relapsed/<br>refractory<br>+ MEC<br>(n = 54) | + 7+3<br>(n = 25)                                      |
| Any TEAE                              | 6 (100)                        | 7 (100)                      | 6 (100)                      | 54 (100)                                     | 25 (100)                                               |
| Serious adverse event                 | 3 (50)                         | 0                            | 2 (33)                       | 18 (33)                                      | 9 (36)                                                 |
| Severe adverse event                  | 1 (17)                         | 3 (43)                       | 3 (50)                       | 15 (28)                                      | 8 (32)                                                 |
| Deaths                                | 0                              | 0                            | 0                            | 0                                            | 2 (8)                                                  |
| Drug-related adverse event            | 4 (67)                         | 4 (57)                       | 3 (50)                       | 28 (52)                                      | 16 (64)                                                |
| Mild                                  | 1 (17)                         | 1 (14)                       | 0                            | 6 (11)                                       | 2 (8)                                                  |
| Moderate                              | 1 (17)                         | 0                            | 0                            | 4 (7)                                        | 6 (24)                                                 |
| Severe                                | 0                              | 1 (14)                       | 1 (17)                       | 9 (17)                                       | 4 (16)                                                 |
| Life-threatening                      | 2 (33)                         | 2 (29)                       | 2 (33)                       | 9 (17)                                       | 4 (16)                                                 |
| Fatal                                 | 0                              | 0                            | 0                            | 0                                            | 0                                                      |
| AE leading to drug<br>discontinuation | 0                              | 0                            | 0                            | 0                                            | 0                                                      |

AE, adverse event; MEC, mitoxantrone/etoposide/cytarabine; RP2D, recommended phase 2 dose; TEAE, treatment-emergent adverse event; 7+3, combination regimen cytarabine/idarubicin.

**Supplemental Table 2. Grade 3 or 4 treatment-emergent adverse events reported in ≥10% of patients in the overall MEC and 7+3-treated populations**

| System organ class / preferred term, n (%)       | Phase 1                |                         |                         | Phase 1/2           |                                       |
|--------------------------------------------------|------------------------|-------------------------|-------------------------|---------------------|---------------------------------------|
|                                                  | R/R 5 mg + MEC (n = 6) | R/R 10 mg + MEC (n = 7) | R/R 20 mg + MEC (n = 6) | R/R + MEC* (n = 66) | Newly diagnosed† 10 mg + 7+3 (n = 25) |
| Blood and lymphatic system disorders             | 5 (83)                 | 5 (71)                  | 4 (67)                  | 52 (79)             | 23 (92)                               |
| Anemia                                           | 4 (67)                 | 1 (14)                  | 1 (17)                  | 17 (26)             | 6 (24)                                |
| Febrile neutropenia                              | 1 (17)                 | 4 (57)                  | 3 (50)                  | 39 (59)             | 22 (88)                               |
| Neutropenia                                      | 2 (33)                 | 0 (0)                   | 0 (0)                   | 11 (17)             | 3 (12)                                |
| Thrombocytopenia                                 | 3 (50)                 | 1 (14)                  | 1 (17)                  | 23 (35)             | 6 (24)                                |
| Infections and infestations                      | 4 (67)                 | 4 (57)                  | 5 (83)                  | 31 (47)             | 9 (36)                                |
| Sepsis                                           | 1 (17)                 | 1 (14)                  | 3 (50)                  | 8 (12)              | 1 (4)                                 |
| Investigations                                   | 4 (67)                 | 1 (14)                  | 0 (0)                   | 23 (35)             | 12 (48)                               |
| Neutrophil count decreased                       | 1 (17)                 | 1 (14)                  | 0 (0)                   | 4 (6)               | 4 (16)                                |
| Platelet count decreased                         | 3 (50)                 | 1 (14)                  | 0 (0)                   | 12 (18)             | 6 (24)                                |
| WBC count decreased                              | 1 (17)                 | 0 (0)                   | 0 (0)                   | 7 (11)              | 5 (20)                                |
| Metabolism and nutrition disorders               | 3 (50)                 | 0 (0)                   | 2 (33)                  | 18 (27)             | 10 (40)                               |
| Hypokalemia                                      | 0 (0)                  | 0 (0)                   | 0 (0)                   | 2 (3)               | 4 (16)                                |
| Hypophosphatemia                                 | 1 (17)                 | 0 (0)                   | 2 (33)                  | 6 (9)               | 3 (12)                                |
| Respiratory, thoracic, and mediastinal disorders | 0 (0)                  | 1 (14)                  | 1 (17)                  | 6 (9)               | 7 (28)                                |
| Pulmonary edema                                  | 0 (0)                  | 0 (0)                   | 0 (0)                   | 1 (2)               | 3 (12)                                |
| Respiratory failure                              | 0 (0)                  | 0 (0)                   | 0 (0)                   | 0 (0)               | 4 (16)                                |

Patients were counted once in each category; if a patient experienced the same coded event more than once, only the greatest severity is presented.

\*Includes 7 patients from the phase 1 dose-escalation phase.

†Patients aged ≥60 years.

MEC, mitoxantrone/etoposide/cytarabine; R/R, relapsed/refractory; WBC, white blood cells; 7+3, combination regimen cytarabine/idarubicin.

**Supplemental Figure 2. Duration of remission with uproleselan in combination with chemotherapy in patients with acute myeloid leukemia among those (A) with relapsed/refractory disease and (B) aged  $\geq 60$  years with newly diagnosed disease. NA, not applicable; RP2D, recommended phase 2 dose.**

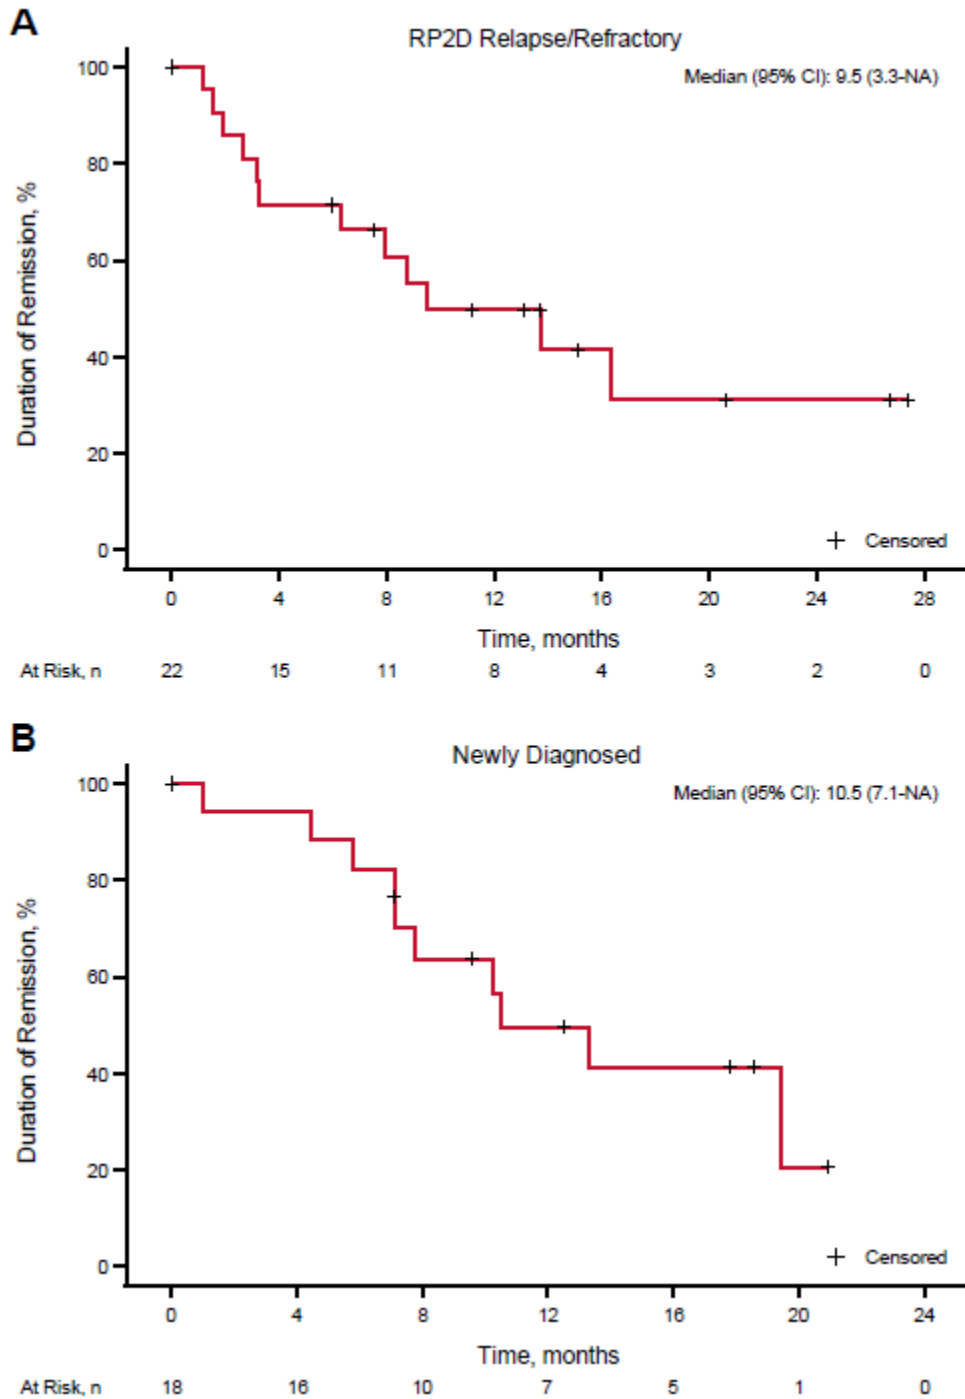

**Supplemental Figure 3. Overall survival with uproleselan in (A) patients according to age, and (B) patients with an adverse risk according to ELN (N = 42) and (C) duration of remission for relapsed patients with an initial complete response duration of <12 months or ≥12 months. ELN, European Leukemia Net; RP2D, recommended phase 2 dose.**

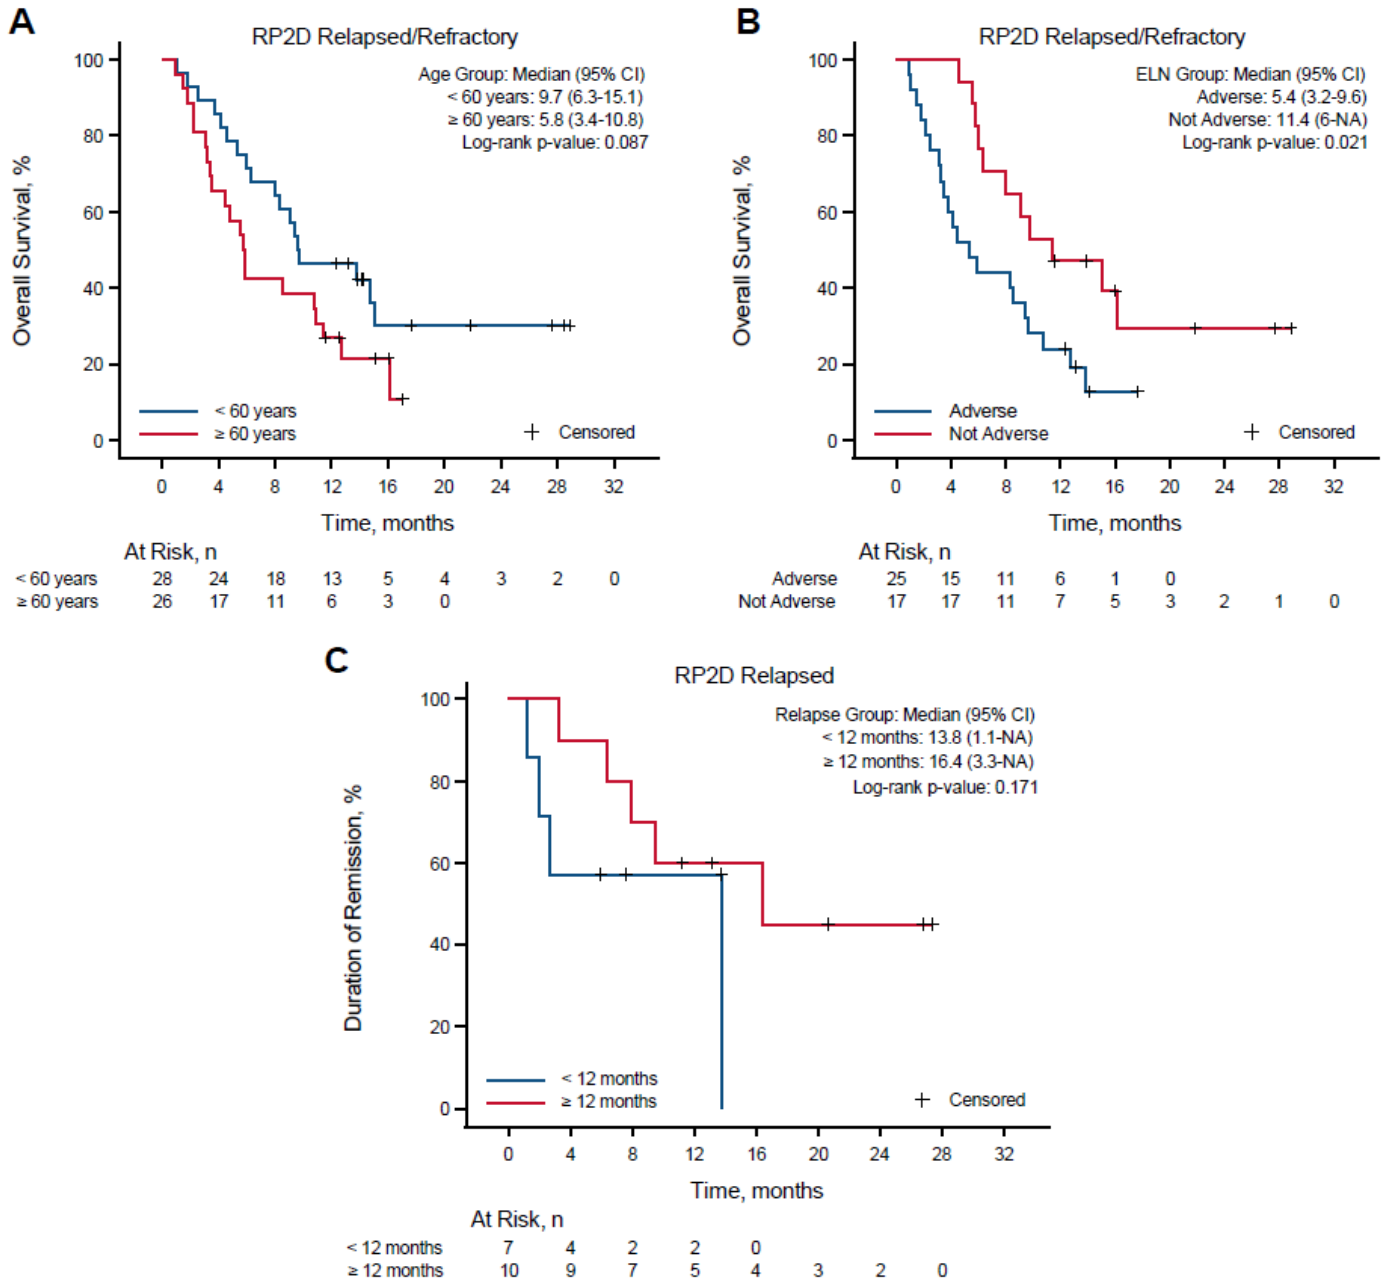

**Supplemental Figure 4. (A) Overall survival in patients with relapsed AML among those with an initial remission duration of <6 months or ≥6 months and (B) duration of remission in patients with relapsed AML among those with an initial remission duration of <6 months or ≥6 months. MEC, mitoxantrone/etoposide/cytarabine; NA, not applicable; RP2D, recommended phase 2 dose.**

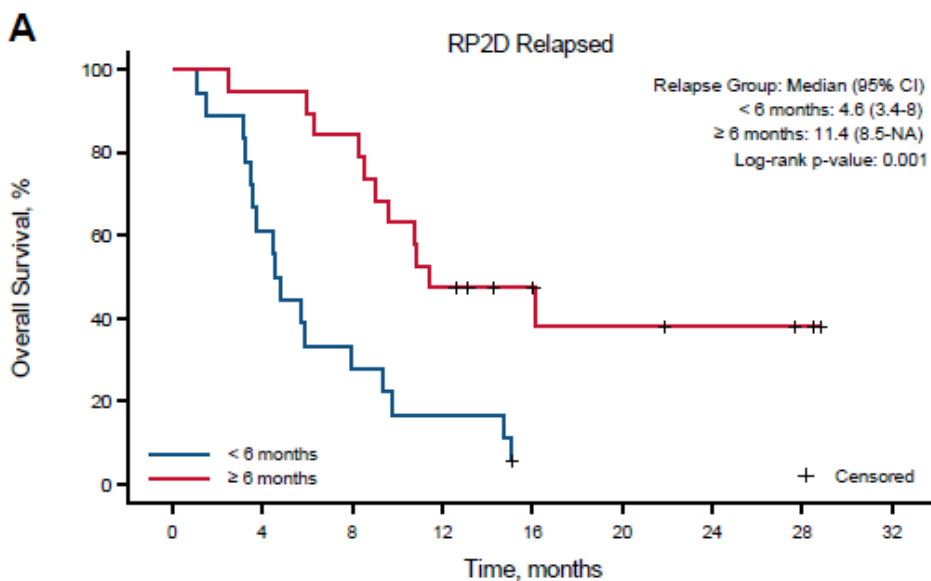

|            | 0  | 4  | 8  | 12 | 16 | 20 | 24 | 28 | 32 |
|------------|----|----|----|----|----|----|----|----|----|
| < 6 months | 18 | 11 | 5  | 3  | 0  |    |    |    |    |
| ≥ 6 months | 19 | 18 | 16 | 9  | 6  | 4  | 3  | 2  | 0  |

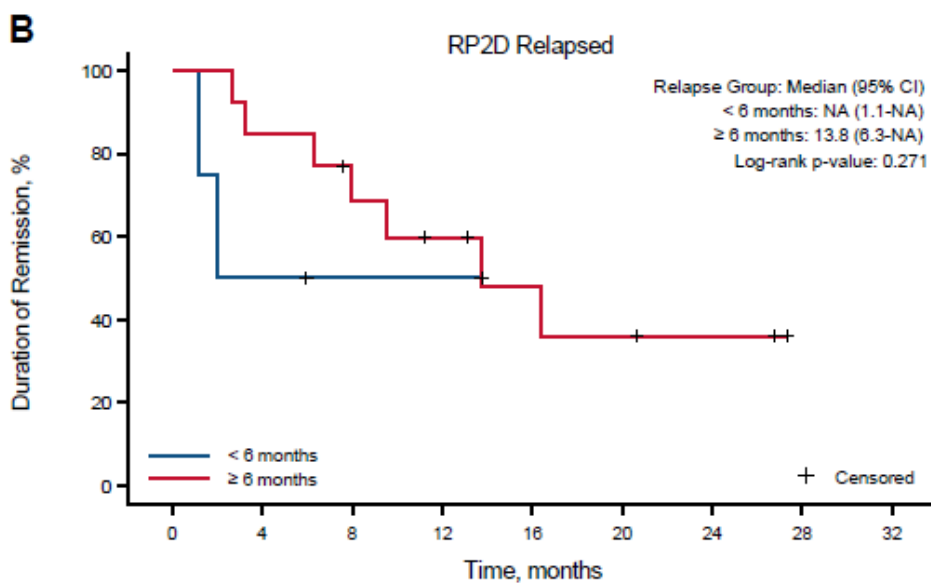

|            | 0  | 4  | 8 | 12 | 16 | 20 | 24 | 28 | 32 |
|------------|----|----|---|----|----|----|----|----|----|
| < 6 months | 4  | 2  | 1 | 1  | 0  |    |    |    |    |
| ≥ 6 months | 13 | 11 | 8 | 6  | 4  | 3  | 2  | 0  |    |

**Supplemental Figure 5. Correlation of E-selectin ligand expression between leukemic stem cells and myeloblasts in bone marrow of patients with AML among those with (A) relapsed/refractory disease and (B) those aged  $\geq 60$  years with newly diagnosed disease.**

E-selectin ligand expression detected by a fit-for-purpose flow cytometric evaluation of bone marrow and peripheral blood samples from patients with AML. E-selectin ligand expression was identified in the leukemic blast population using FITC-HECA-452. The HECA-452 antibody recognizes the E-selectin carbohydrate binding ligand shared by sLea and sLea/x. The backbone panel to identify the AML population and leukemic stem cells from non-leukemic cells was composed of fluorochrome-labeled antibodies to CD45, CD34, CD38, and CD123. AML, acute myeloid leukemia; E-sel-L, E-selectin ligand; LCS, leukemic stem cells.

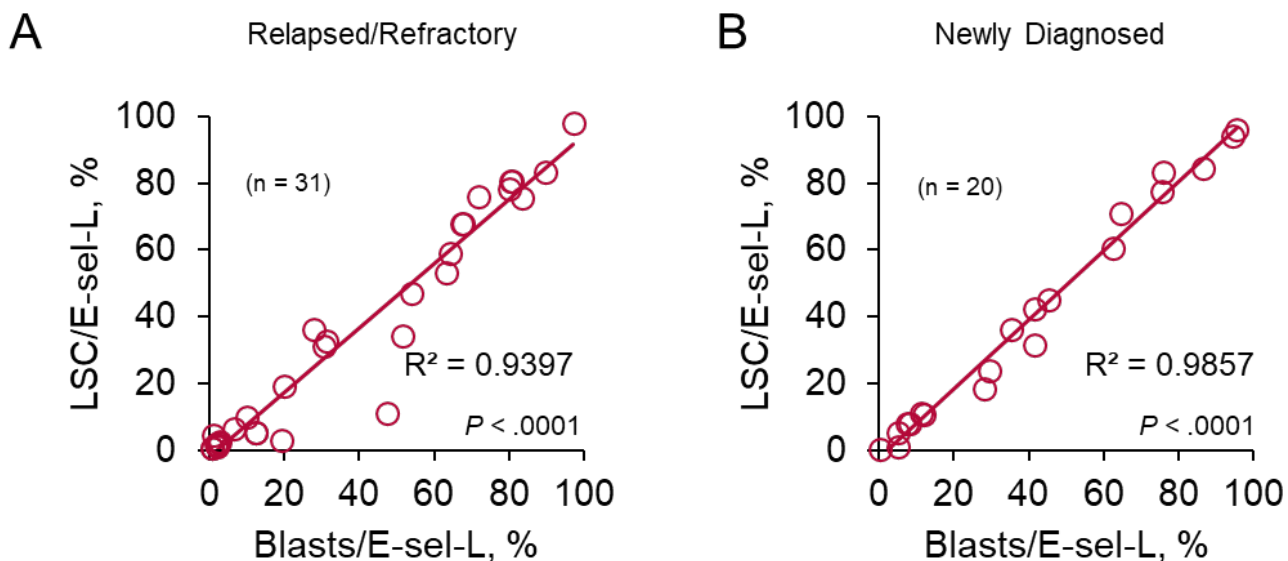

Supplement: mmc1_BLOOD428.pdf [file mmc1_BLOOD428.pdf]
